# Supplementary material for: Chlorophyll enhances oxidative stress tolerance in Caenorhabditis elegans and extends its lifespan
Source: PeerJ journal article supplement (doi:10.7717/peerj.1879), 2016-04-07
Supplement: Fig_S1.pdf [file Fig_S1.pdf]

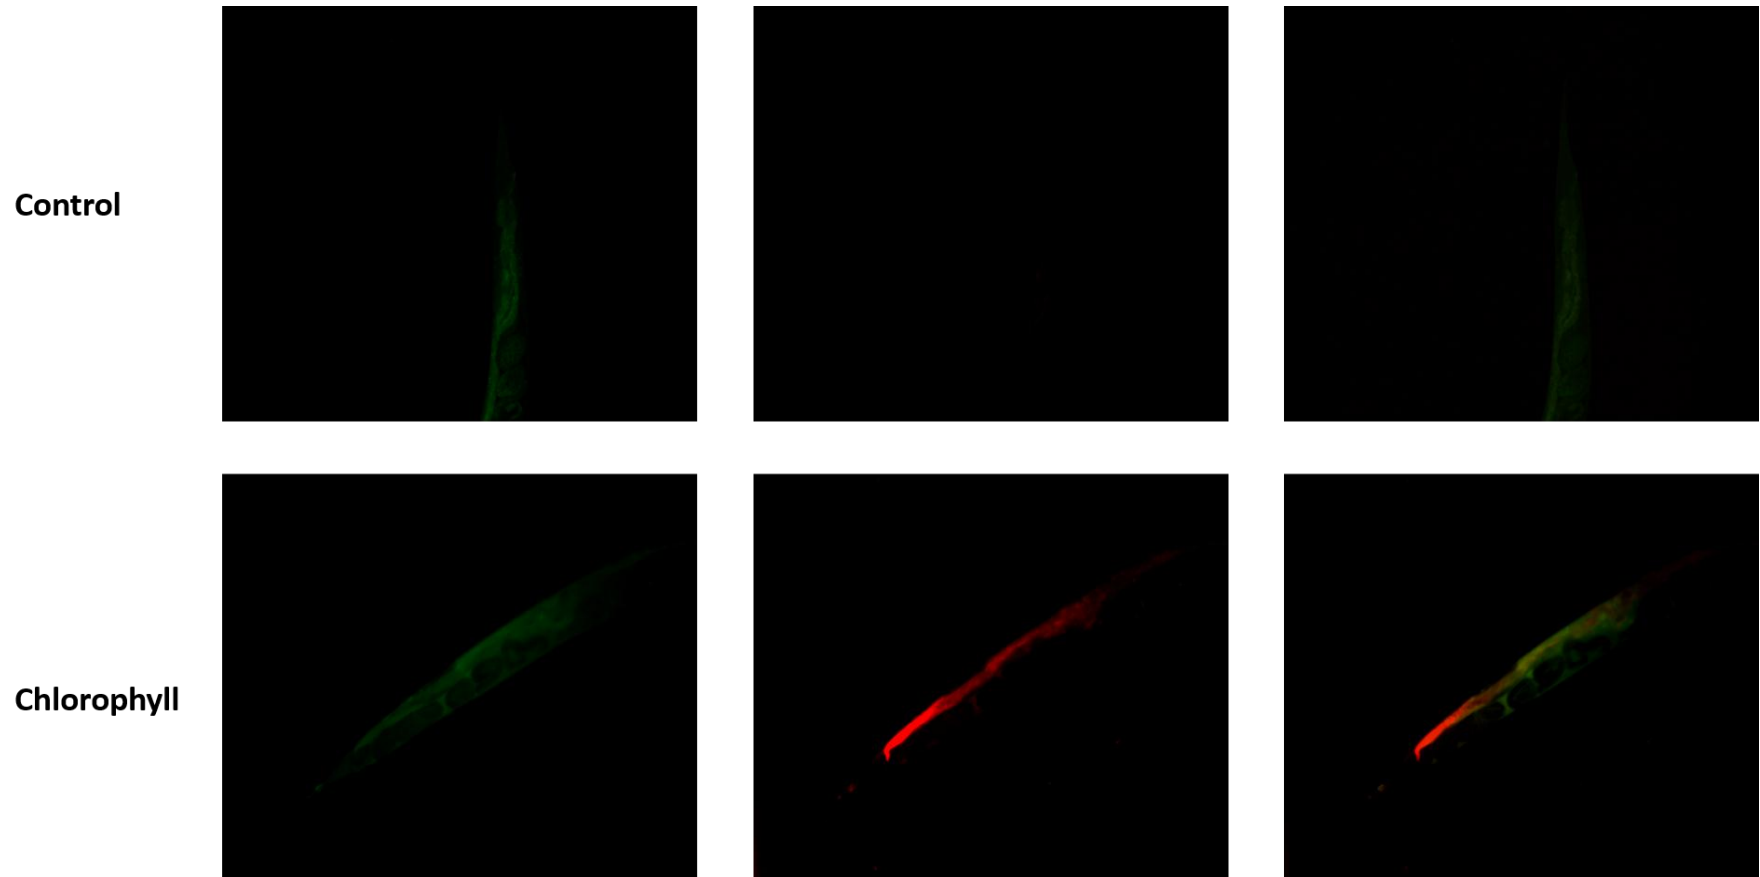

**Fig. S 1** Detection of chlorophyll inside the worms. Chlorophyll shows characteristic red fluorescence under the UV-light.
