# Supplementary material for: Chlorophyll enhances oxidative stress tolerance in Caenorhabditis elegans and extends its lifespan
Source: PubMed Central journal article supplement (PMC4830245; doi:10.7717/peerj.1879), 2016-04-07
Supplement: peerj-04-1879-s002.pdf [file peerj-04-1879-s002.pdf]

## Raw data for DPPH

| <b>Chlorophyll</b>      |   |              |    | <b>EGCG</b>                  |    |              |    |
|-------------------------|---|--------------|----|------------------------------|----|--------------|----|
| Concentration ( mg/ml ) |   | Inhibition % |    | Concentration ( $\mu$ g/ml ) |    | Inhibition % |    |
| 0.1                     | 3 | 3            | 0  | 1                            | 19 | 22           | 15 |
| 1                       | 4 | 2            | 12 | 2                            | 29 | 34           | 25 |
| 5                       | 3 | 3            | 11 | 3                            | 40 | 45           | 37 |
| 25                      | 1 | 1            | 12 | 4                            | 50 | 55           | 48 |
| 100                     | 2 | 1            | 7  | 5                            | 60 | 66           | 55 |
