# Supplementary material for: Chlorophyll enhances oxidative stress tolerance in Caenorhabditis elegans and extends its lifespan
Source: PubMed Central journal article supplement (PMC4830245; doi:10.7717/peerj.1879), 2016-04-07
Supplement: peerj-04-1879-s003.pdf [file peerj-04-1879-s003.pdf]

Raw data of pumping assay

| <b>Day 4</b> |                    |                    | <b>Day 5</b> |                    |                    | <b>Day 6</b> |                    |                    | <b>Day 7</b> |                    |                    |
|--------------|--------------------|--------------------|--------------|--------------------|--------------------|--------------|--------------------|--------------------|--------------|--------------------|--------------------|
| Control      | Chlor. 10<br>mg/ml | Chlor. 50<br>mg/ml | Control      | Chlor. 10<br>mg/ml | Chlor. 50<br>mg/ml | Control      | Chlor. 10<br>mg/ml | Chlor. 50<br>mg/ml | Control      | Chlor. 10<br>mg/ml | Chlor. 50<br>mg/ml |
| 220          | 256                | 279                | 193          | 216                | 223                | 153          | 228                | 195                | 169          | 187                | 210                |
| 222          | 221                | 246                | 214          | 230                | 228                | 171          | 186                | 218                | 132          | 206                | 193                |
| 253          | 234                | 235                | 191          | 245                | 263                | 186          | 209                | 216                | 142          | 204                | 182                |
| 243          | 267                | 228                | 199          | 238                | 240                | 150          | 216                | 208                | 149          | 175                | 192                |
| 257          | 256                | 249                | 187          | 227                | 234                | 160          | 197                | 215                | 146          | 168                | 185                |
| 229          | 228                | 269                | 230          | 220                | 203                | 174          | 218                | 228                | 160          | 200                | 189                |
| 238          | 236                | 246                | 234          | 225                | 210                | 160          | 200                | 213                | 163          | 179                | 180                |
| 242          | 258                | 250                | 212          | 211                | 266                | 162          | 209                | 214                | 150          | 180                | 205                |
| 257          | 266                | 274                | 235          | 268                | 240                | 178          | 202                | 223                | 164          | 192                | 197                |
| 236          | 234                | 269                | 228          | 263                | 265                | 149          | 194                | 217                | 158          | 180                | 188                |
