# Supplementary material for: Chlorophyll enhances oxidative stress tolerance in Caenorhabditis elegans and extends its lifespan
Source: PubMed Central journal article supplement (PMC4830245; doi:10.7717/peerj.1879), 2016-04-07
Supplement: peerj-04-1879-s004.pdf [file peerj-04-1879-s004.pdf]

### Raw data for ABTS

| Chlorophyll             |                      |       |       | Trolox                       |                      |       |       |
|-------------------------|----------------------|-------|-------|------------------------------|----------------------|-------|-------|
| Concentration ( mg/ml ) | Absorbance at 734 nm |       |       | Concentration ( $\mu$ g/ml ) | Absorbance at 734 nm |       |       |
| 500                     | 0.216                | 0.214 | 0.205 | 10                           | 0.072                | 0.070 | 0.074 |
| 250                     | 0.308                | 0.309 | 0.287 | 5                            | 0.071                | 0.070 | 0.072 |
| 125                     | 0.392                | 0.386 | 0.375 | 2.5                          | 0.077                | 0.074 | 0.030 |
| 62.5                    | 0.437                | 0.434 | 0.421 | 1.25                         | 0.124                | 0.120 | 0.129 |
| 31.25                   | 0.489                | 0.487 | 0.487 | 0.625                        | 0.377                | 0.372 | 0.379 |
| 15.625                  | 0.517                | 0.506 | 0.495 | 0.3125                       | 0.506                | 0.500 | 0.510 |
| 7.8125                  | 0.532                | 0.534 | 0.521 | 0.15625                      | 0.587                | 0.582 | 0.589 |
| 3.90625                 | 0.543                | 0.545 | 0.530 | 0.078125                     | 0.610                | 0.613 | 0.619 |
| 1.953125                | 0.552                | 0.559 | 0.547 | 0.0390625                    | 0.658                | 0.663 | 0.653 |
| 0.9765625               | 0.562                | 0.563 | 0.554 | 0.01953125                   | 0.646                | 0.649 | 0.641 |
