# Supplementary material for: Chlorophyll enhances oxidative stress tolerance in Caenorhabditis elegans and extends its lifespan
Source: PubMed Central journal article supplement (PMC4830245; doi:10.7717/peerj.1879), 2016-04-07
Supplement: peerj-04-1879-s005.pdf [file peerj-04-1879-s005.pdf]

Raw data of SOD-3::GFP expression

|    | Control | Chlorophyll 10 mg/ml |
|----|---------|----------------------|
| 1  | 110,86  | 104,83               |
| 2  | 100,96  | 133,19               |
| 3  | 149,06  | 145,91               |
| 4  | 79,98   | 129,75               |
| 5  | 75,77   | 149,13               |
| 6  | 122,58  | 116,31               |
| 7  | 153,06  | 156,94               |
| 8  | 82,72   | 118,11               |
| 9  | 120,44  | 111,21               |
| 10 | 73,66   | 165,15               |
| 11 | 64,21   | 168,8                |
| 12 | 93,35   | 115,8                |
| 13 | 66,17   | 107,65               |
| 14 | 138     | 170,3                |
| 15 | 50,66   | 141,36               |
| 16 | 49      | 109,02               |
| 17 | 119,3   | 134,25               |
| 18 | 84,81   | 114,93               |
| 19 | 85,86   | 96,44                |
| 20 | 149,36  | 175,18               |
| 21 | 126,93  | 109,12               |
| 22 | 55,25   | 129,36               |
| 23 | 115,9   | 120,44               |
| 24 | 96,8    | 137,69               |
| 25 | 105,36  | 112,89               |

|    |        |        |
|----|--------|--------|
| 26 | 67,76  | 98,79  |
| 27 | 138,84 | 133,81 |
| 28 | 89,41  | 101,82 |
| 29 | 55,21  | 166,43 |
| 30 | 90,55  | 112,62 |
| 31 | 144,71 | 105,19 |
| 32 | 80,88  | 171,74 |
| 33 | 90,3   | 121,36 |
| 34 | 126,25 | 164,78 |
| 35 | 136,2  | 148,05 |
| 36 | 122,45 | 144,5  |
| 37 | 87,21  | 128,2  |
| 38 | 113,54 | 148,26 |
| 39 | 87,93  | 155,21 |
| 40 | 76,25  | 132,01 |
| 41 | 110,44 | 156,78 |
| 42 | 113,43 | 122,65 |
| 43 | 97,88  | 119,78 |
| 44 | 74,93  | 131,56 |
| 45 | 129,43 | 142,67 |
| 46 | 83,68  | 109,87 |
| 47 | 97,65  | 123,42 |
| 48 | 96,36  | 136,98 |
| 49 | 104,22 | 148,54 |
| 50 | 98,87  | 132,58 |
