# Supplementary material for: Chlorophyll enhances oxidative stress tolerance in Caenorhabditis elegans and extends its lifespan
Source: PubMed Central journal article supplement (PMC4830245; doi:10.7717/peerj.1879), 2016-04-07
Supplement: peerj-04-1879-s006.pdf [file peerj-04-1879-s006.pdf]

## Raw data of quantitation of hsp-16.2/GFP expression

The GFP expression density in the pharynx of TJ375 worms

|    |         |                     |    |        |        |
|----|---------|---------------------|----|--------|--------|
|    | Juglone | Juglone+Chlorophyll | 26 | 59.73  | 17.925 |
| 1  | 36.215  | 15.501              | 27 | 68.191 | 59.2   |
| 2  | 14.331  | 21.314              | 28 | 56.042 | 43.486 |
| 3  | 38.765  | 29.118              | 29 | 53.667 | 52.999 |
| 4  | 42.545  | 14.696              | 30 | 56.514 | 37.047 |
| 5  | 40.975  | 34.855              | 31 | 47.462 | 44.538 |
| 6  | 45.744  | 16.997              | 32 | 40.584 | 55.413 |
| 7  | 34.855  | 13.983              | 33 | 39.8   | 37.891 |
| 8  | 35.68   | 11.206              | 34 | 44.187 | 56.403 |
| 9  | 74.531  | 14.944              | 35 | 45.061 | 14.19  |
| 10 | 83.567  | 20.017              | 36 | 27.148 | 14.667 |
| 11 | 28.574  | 12.61               | 37 | 46.071 | 17.17  |
| 12 | 44.767  | 20.97               | 38 | 46.672 | 57.409 |
| 13 | 71.951  | 9.474               | 39 | 31.405 | 20.325 |
| 14 | 48.279  | 8.197               | 40 | 43.418 | 24.62  |
| 15 | 60.87   | 41.862              | 41 | 50.074 | 51.57  |
| 16 | 35.023  | 46.834              | 42 | 29.98  | 43.797 |
| 17 | 18.301  | 51.313              | 43 | 43.61  | 49.348 |
| 18 | 9.598   | 13.388              | 44 | 41.073 | 19.254 |
| 19 | 59.237  | 22.775              | 45 | 30.283 | 38.303 |
| 20 | 54.26   | 18.675              | 46 | 34.047 | 17.004 |
| 21 | 28.605  | 27.173              | 47 | 42.708 | 14.242 |
| 22 | 40.217  | 13.115              | 48 | 45.92  | 14.558 |
| 23 | 78.374  | 11.525              | 49 | 48.649 | 12.865 |
| 24 | 61.638  | 19.282              | 50 | 35.398 | 10.453 |
| 25 | 53.874  | 13.386              |    |        |        |
